# Supplementary material
Source: Royal Society of Chemistry journal article supplement (doi:10.1039/d6np00039h)
Supplement: d6np00039h1.pdf [file d6np00039h1.pdf]

## **Supplementary Information for**

# **Microbial biotransformation of plant-derived metabolites: Mechanisms, Pathways, and Multi-Omics Integration**

Authors: Youngse Oh,<sup>†a</sup> Jaeyoun Lee,<sup>†a</sup> Soohyun Um,<sup>\*b</sup> and Seung Hyun Kim<sup>\*a</sup>

Author Affiliations:

<sup>a</sup> College of Pharmacy, Yonsei Institute of Pharmaceutical Sciences, Yonsei University, Incheon 21983, Republic of Korea

<sup>b</sup> Department of Forest Products and Biotechnology, Kookmin University, Seoul 02707, Republic of Korea

\* Corresponding authors

† These authors contributed equally to this work.

Table S1. Hydrolytic activation and deconjugation of major classes in plant-derived metabolites

| Classification | Substrate                                              | Key enzyme                                                                  | Representative microbiota                                                | End-product                                              | Evidence level                                                 | Functional shift                                      | Ref.     |
|----------------|--------------------------------------------------------|-----------------------------------------------------------------------------|--------------------------------------------------------------------------|----------------------------------------------------------|----------------------------------------------------------------|-------------------------------------------------------|----------|
| Flavonoids     | Naringin                                               | $\alpha$ -Rhamnosidase                                                      | <i>Lactiplantibacillus plantarum</i>                                     | Naringenin                                               | Recombinant enzyme;<br>isolate culture                         | NA                                                    | 1,2      |
|                | 3''-oxo-puerarin                                       | C-deglycosylation enzymes<br>(DgpB-C)                                       | <i>Dorea</i> sp. PUE                                                     | Daidzein                                                 | Recombinant enzyme                                             | Bioavailability $\uparrow$                            | 3        |
|                | Rutin                                                  | $\beta$ -glucosidase;<br>$\alpha$ -L-rhamnosidase;<br>$\beta$ -rutinosidase | <i>Bacteroides</i> JY-6;<br><i>Fusobacterium</i> K-60                    | Quercetin-3-O-<br>glucoside; quercetin;<br>leucocyanidin | Fecal incubation;<br>recombinant enzyme                        | Anti-oxidant $\uparrow$                               | 2,4      |
|                | Epimedium B                                            | $\beta$ -xylosidase Dt-2286                                                 | <i>Dictyoglomus turgidum</i>                                             | Baohuoside I;<br>Sagittatoside B;                        | Recombinant enzyme                                             | Anti-osteoporosis $\uparrow$                          | 5        |
|                | Theasinensins A                                        | Tannase                                                                     | Human gut microbes                                                       | Theasinensins C                                          | Fecal incubation                                               | Bioavailability $\uparrow$                            | 6        |
|                | Mangiferin                                             | C-C glucosyl-cleaving enzyme                                                | <i>Bacillus</i> sp. KM7-1;<br><i>Bacteroides</i> sp. MANG                | Norathyriol                                              | Isolate culture;<br>animal study                               | Anti-diabetes $\uparrow$ ; anti-<br>cancer $\uparrow$ | 7        |
|                | Hesperidin                                             | $\alpha$ -L-rhamnosidase;<br>$\beta$ -glucosidase                           | <i>Bifidobacterium</i><br><i>pseudocatenulatum</i>                       | Hesperetin                                               | Isolate culture                                                | Anti-inflammatory $\uparrow$                          | 8,9      |
|                | Daidzin                                                | $\beta$ -glucosidase                                                        | <i>Eubacterium ramulus</i> ;<br><i>Bifidobacterium breve</i>             | Daidzein                                                 | Isolate culture;<br>animal study                               | Neuroprotection $\uparrow$                            | 10,11    |
|                | Kaempferol-3-O-sophoroside                             | $\beta$ -glucosidase                                                        | <i>Lactobacillus paracasei</i>                                           | Kaempferol                                               | Isolate culture;<br>animal study                               | Anti-aging $\uparrow$                                 | 12       |
|                | Epimedin A, B, C                                       | $\beta$ -glucosidase;<br>$\alpha$ -L-rhamnosidase                           | <i>Bacteroides thetaiotaomicron</i>                                      | Icariin II;<br>Icariin A, B                              | Recombinant enzyme;<br>animal study                            | Anti-osteoporosis $\uparrow$                          | 13,14,15 |
|                | Isorhamnetin-3-O-<br>neohesperidoside                  | $\beta$ -glucosidase                                                        | <i>Escherichia</i> sp. 23                                                | Isorhamnetin-3-O-<br>glucoside;<br>isorhamnetin          | Isolate culture                                                | Anti-inflammation $\uparrow$                          | 16       |
|                | Luteolin 7-O- and<br>6-C-glucoside                     | $\beta$ -glucosidase                                                        | <i>Eubacterium cellulosolvans</i>                                        | Luteolin                                                 | Recombinant enzyme;<br>gene identification;<br>isolate culture | Bioavailability $\uparrow$                            | 17,18    |
|                | Calycosin-7-O- $\beta$ -D-glucoside                    | $\beta$ -glucosidase                                                        | Rat gut microbes                                                         | Calycosin                                                | Animal study;<br>fecal incubation                              | Neuroprotection $\uparrow$                            | 19       |
|                | Wogonoside                                             | $\beta$ -glucuronidase                                                      | Human gut microbes                                                       | Wogonin                                                  | Fecal incubation                                               | Anti-inflammation $\uparrow$                          | 20       |
|                | Cyanidin 3-glucoside                                   | $\beta$ -glucosidase                                                        | <i>Eubacterium ramulus</i>                                               | Cyanidin                                                 | Animal study;<br>fecal incubation                              | Bioavailability $\uparrow$                            | 21       |
|                | Quercetin 3-O-glucoside;<br>isorhamnetin 3-O-glucoside | $\beta$ -glucosidase                                                        | <i>Bifidobacterium animalis</i> ;<br><i>Lactocaseibacillus paracasei</i> | Quercetin;<br>isorhamnetin                               | Recombinant enzyme;<br>isolate culture                         | Anti-inflammatory $\uparrow$                          | 22,23    |
|                | Baicalin                                               | $\beta$ -glucuronidase                                                      | <i>Escherichia coli</i> ;<br><i>Lactobacillus brevis</i>                 | Baicalein;<br>oroxylin A                                 | Recombinant enzyme;<br>fecal incubation                        | Bioavailability $\uparrow$                            | 24,25,26 |
| Terpenoids     | Ginsenoside Rb1                                        | $\beta$ -glucosidase                                                        | <i>Irpex lacteus</i>                                                     | Ginsenoside Rd                                           | Isolate culture;<br>purified enzyme                            | NA                                                    | 27       |
|                | Compound K                                             | $\beta$ -glucosidase                                                        | <i>Alistipes finegoldii</i> ;<br><i>Parabacteroides merdae</i>           | (20S)-Protopanaxadiol                                    | Isolate culture;<br>fecal incubation                           | Antidiabetic $\uparrow$                               | 28       |
|                | Ginsenoside Rb1                                        | Type-I ginsenosidase                                                        | <i>Cladosporium xylophilum</i>                                           | Ginsenoside F2                                           | Isolate culture:<br>purified enzyme                            | Bioavailability $\uparrow$                            | 29       |
|                | Notoginsenoside F <sub>1</sub>                         | Ginsenosidase                                                               | <i>Cladosporium xylophilum</i>                                           | Ginsenoside B7                                           | Isolate culture:                                               | NA                                                    | 29       |

|                |                                   |                                     |                                                                                     |                                    |                                                                          |                                |       |
|----------------|-----------------------------------|-------------------------------------|-------------------------------------------------------------------------------------|------------------------------------|--------------------------------------------------------------------------|--------------------------------|-------|
|                | Albiflorin                        | Esterases                           | <i>Bifidobacterium breve</i> ;<br><i>Bifidobacterium longum</i>                     | Benzoic acid                       | purified enzyme<br>Animal study;<br>fecal incubation;<br>isolate culture | Anti-depression↑               | 30,31 |
|                | Pedunculoside                     | NA                                  | <i>Bifidobacterium adolescentis</i>                                                 | Deglycosylated<br>products         | Isolate culture;<br>animal study                                         | Bioavailability↑               | 32    |
|                | Glycyrrhizin                      | β-glucuronidase                     | <i>Eubacterium</i> L-8;<br><i>Bacteroidetes</i> J-37;<br><i>Streptococcus</i> LJ-22 | 18β-glycyrrhetic acid              | Recombinant enzyme;<br>isolate culture                                   | Anti-allergic↑;<br>anti-tumor↑ | 33,34 |
|                | Geniposide                        | β-glucosidase;<br>carboxylesterases | <i>Eubacterium</i> sp. A-44                                                         | Genipin;<br>geniposidic acid       | Animal study;<br>fecal incubation                                        | Anti-hepatitis↑                | 35,36 |
|                | Ardipusillosides I                | β-glucosidase;<br>α-L-rhamnosidase  | Human gut microbes                                                                  | Deglycosylated<br>product          | Fecal incubation                                                         | Bioavailability↑               | 37    |
|                | Mogroside III                     | NA                                  | Human gut microbes                                                                  | Mogrol                             | Fecal incubation                                                         | Bioavailability↑               | 38    |
|                | Asiaticoside                      | Glycoside hydrolases                | <i>Aspergillus niger</i>                                                            | Corresponding<br>aglycones         | Isolate culture                                                          | Bioavailability↑               | 39    |
| Anthraquinones | Sennoside A                       | β-glucosidase                       | <i>Bifidobacterium</i> sp. SEN                                                      | Sennidin A-8-<br>monoglucoside     | Isolate culture;<br>animal study                                         | Purgation↑                     | 40    |
| Lignans        | Secoisolariciresinol              | NA                                  | <i>Eubacterium</i> sp. ARC-2                                                        | Corresponding<br>aglycones         | Isolate culture                                                          | NA                             | 41,42 |
| Alkaloids      | Boldine-9-O-β-D-glucoside         | β-glucosidase                       | <i>Cunninghamella blackesleeana</i>                                                 | Boldine                            | Isolate culture;<br>purified enzyme                                      | Lipophilicity ↑                | 43    |
|                | Diester diterpenoid alkaloids     | Carboxylesterases                   | Human gut microbes                                                                  | Monoester<br>diterpenoid alkaloids | Recombinant enzyme;<br>isolate culture                                   | Toxicity↓                      | 44    |
| Phenols        | Hydroxycinnamic acid<br>glycoside | Feruloyl esterase                   | <i>Lactiplantibacillus plantarum</i> ;<br><i>Lactobacillus johnsonii</i>            | Hydroxycinnamic acid               | Recombinant enzyme;<br>isolate culture                                   | Bioavailability↑               | 45    |
|                | Ellagitannins;<br>gallotannins    | Tannase                             | <i>Lactiplantibacillus plantarum</i>                                                | Ellagic acid;<br>gallic acid       | Recombinant enzyme;<br>isolate culture                                   | NA                             | 45,46 |
|                | Polyphenolic β-glycoside          | Phospho-β-glucosidase               | <i>Lactobacillus acidophilus</i> ;<br><i>Furfurilactobacillus rossiae</i>           | Phenolic aglycone                  | Recombinant enzyme;<br>isolate culture                                   | NA                             | 45,47 |
|                | Galloyl esters                    | Tannase                             | <i>Lactiplantibacillus plantarum</i>                                                | Gallic acid                        | Recombinant enzyme;<br>isolate culture                                   | NA                             | 1     |
|                | α-Arabinosylated phenolics        | α-L-arabinosidase                   | <i>Lactiplantibacillus plantarum</i>                                                | Phenolic aglycone                  | Recombinant enzyme;<br>isolate culture                                   | NA                             | 1     |
|                | Chlorogenic acid                  | Hydroxycinnamic acid esterase       | <i>Bifidobacterium animalis</i>                                                     | Hydroxycinnamic acid               | Recombinant enzyme;<br>isolate culture                                   | NA                             | 48    |
|                | Amygdalin                         | β-glucosidase                       | Rat gut microbes                                                                    | Mandelonitrile;<br>prunasin        | Fecal incubation;<br>animal study                                        | Toxicity↑                      | 49,50 |
|                | Ellagitannins                     | Tannase                             | <i>Akkermansia muciniphila</i>                                                      | Ellagic acid                       | Recombinant enzyme;<br>isolate culture                                   | Neuroprotection↑               | 51    |
|                | Scopolamine                       | NA                                  | Rat gut microbes                                                                    | Scopine                            | Animal study                                                             | NA                             | 52,53 |
|                | p-Coumaric acids                  | Feruloyl esterases                  | <i>Lactiplantibacillus</i> sp.                                                      | Ferulic acid                       | Recombinant enzyme                                                       | Anti-oxidant↑                  | 54    |
|                | Gallic tannins                    | Tannase                             | <i>Lactiplantibacillus plantarum</i>                                                | Gallic acid                        | Purified enzyme;<br>isolate culture                                      | Anti-inflammatory↑             | 55    |

|          |                      |                                                |                                   |                                        |                                     |                  |    |
|----------|----------------------|------------------------------------------------|-----------------------------------|----------------------------------------|-------------------------------------|------------------|----|
|          | Mangiferin           | NA                                             | <i>Lachnospiraceae</i> sp. CG19-1 | Norathyriol                            | Isolate culture                     | NA               | 56 |
| Steroids | Pulsatilla saponin D | NA                                             | Rat gut microbes                  | Corresponding deglycosylation products | Animal study                        | Bioavailability↑ | 57 |
| Others   | Aceteoside           | Feruloyl esterase;<br>$\alpha$ -L-rhamnosidase | <i>Alternaria botrytis</i>        | Verbasoside;<br>hydroxysalidroside     | Purified enzyme;<br>isolate culture | NA               | 58 |

## References

- 1 R. Muñoz, B. De Las Rivas, H. Rodríguez, M. Esteban-Torres, I. Reverón, L. Santamaría, J. M. Landete, L. Plaza-Vinuesa, A. Sánchez-Arroyo and N. Jiménez, *Int. J. Food Microbiol.*, 2024, **412**, 110555.
- 2 A. Ferreira-Lazarte, L. Plaza-Vinuesa, B. De Las Rivas, M. Villamiel, R. Muñoz and F. J. Moreno, *Int. J. Biol. Macromol.*, 2021, **193**, 1093-1102.
- 3 K. Nakamura, S. Zhu, K. Komatsu, M. Hattori and M. Iwashima, *Appl. Environ. Microbiol.*, 2020, **86**(14), e00607-00620.
- 4 A. Riva, D. Kolimár, A. Spittler, L. Wisgrill, C. W. Herbold, L. Abrankó and D. Berry, *Front. Microbiol.*, 2020, **11**, 585428.
- 5 X. Tong, Z. Qi, D. Zheng, J. Pei, Q. Li and L. Zhao, *Bioorg. Chem.*, 2021, **111**, 104906.
- 6 Z. Liu, W. J. De Bruijn, M. G. Sanders, S. Wang, M. E. Bruins and J.-P. Vincken, *J. Agric. Food Chem.*, 2021, **69**(8), 2477-2484.
- 7 U. Hasanah, K. Miki, T. Nitoda and H. Kanzaki, *Biosci. Biotechnol. Biochem.*, 2021, **85**(4), 989-997.
- 8 A. Mas-Capdevila, J. Teichenne, C. Domenech-Coca, A. Caimari, J. M. Del Bas, X. Escoté and A. Crescenti, *Nutrients*, 2020, **12**(5), 1488.
- 9 A. Amaretti, S. Raimondi, A. Leonardi, A. Quartieri and M. Rossi, *Nutrients*, 2015, **7**(4), 2788-2800.
- 10 T. A. Mace, M. B. Ware, S. A. King, S. Loftus, M. R. Farren, E. McMichael, S. Scoville, C. Geraghty, G. Young and W. E. Carson III, *Sci. Rep.*, 2019, **9**(1), 5068.
- 11 R. Yao, C. Wong, K. Nakamura, E. Mitsuyama, A. Tanaka, T. Kuhara, T. Odamaki and J.-Z. Xiao, *Benef. Microbes*, 2019, **10**(5), 521-532.
- 12 Y. Shimojo, Y. Ozawa, T. Toda, K. Igami and T. Shimizu, *Sci. Rep.*, 2018, **8**(1), 9239.
- 13 L. Cui, E. Sun, Z. Zhang, Q. Qian, X. Tan, F. Xu and X. Jia, *J. Agric. Food Chem.*, 2013, **61**(15), 3589-3599.
- 14 L. Cui, E. Sun, Z. Zhang, X. Tan, F. Xu and X. Jia, *Biomed. Chromatogr.*, 2014, **28**(10), 1306-1312.
- 15 T. Wu, J. Pei, L. Ge, Z. Wang, G. Ding, W. Xiao and L. Zhao, *Bioorg. Chem.*, 2018, **81**, 461-467.
- 16 L.-y. Du, M. Zhao, J.-h. Tao, D.-w. Qian, S. Jiang, E.-x. Shang, J.-m. Guo, P. Liu, S.-l. Su and J.-a. Duan, *J. Chromatogr. Sci.*, 2017, **55**(3), 243-250.
- 17 A. Braune and M. Blaut, *Appl. Environ. Microbiol.*, 2012, **78**(22), 8151-8153.
- 18 A. Braune, W. Engst and M. Blaut, *Environ. Microbiol.*, 2016, **18**(7), 2117-2129.
- 19 J.-Q. Ruan, S. Li, Y.-P. Li, W.-J. Wu, S. M.-Y. Lee and R. Yan, *Drug Metab. Dispos.*, 2015, **43**(10), 1601-1611.
- 20 S. Xing, M. Wang, Y. Peng, D. Chen and X. Li, *J. Ethnopharmacol.*, 2014, **152**(1), 183-189.
- 21 L. Hanske, W. Engst, G. Loh, S. Sczesny, M. Blaut and A. Braune, *Br. J. Nutr.*, 2013, **109**(8), 1433-1441.
- 22 S. Y. Youn, M. S. Park and G. E. Ji, *J. Ind. Microbiol. Biotechnol.*, 2012, **22**(12), 1714-1723.
- 23 C. Wang, Y. Wang, Y. Teng, J. Kong, F. Dong, J. Du and Y. Zhang, *Int. J. Food Microbiol.*, 2025, **429**, 111019.
- 24 J.-S. Yim, Y.-S. Kim, S.-K. Moon, K.-H. Cho, H.-S. Bae, J.-J. Kim, E.-K. Park and D.-H. Kim, *Biol. Pharm. Bull.*, 2004, **27**(10), 1580-1583.
- 25 H.-t. Trinh, E.-h. Joh, H.-y. Kwak, N.-i. Baek and D.-h. Kim, *Acta Pharmacol. Sin.*, 2010, **31**(6), 718-724.
- 26 D. H. Han, Y. Lee and J.-H. Ahn, *J. Ind. Microbiol. Biotechnol.*, 2016, **26**(11), 1918-1923.
- 27 Y. Gao, Y. Feng, Y. Chang, Z. Zhu, H. Zhao, W. Xu, M. Zhao, Y. Xiao, L. Tian and Y. Xiu, *ACS omega*, 2024, **9**(21), 22744-22753.
- 28 S. Huang, S. Li, C. Manyun, W. Lin, L. Jing, W. Zhang and W. Huang, *Chin. J. Nat. Med.*, 2023, **21**(10), 723-729.
- 29 Y.-F. Li, Y.-Z. Liang, X.-M. Cui, L.-J. Shao, D.-J. Lou and X.-Y. Yang, *Molecules*, 2022, **27**(19), 6615.
- 30 Z.-X. Zhao, J. Fu, S.-R. Ma, R. Peng, J.-B. Yu, L. Cong, L.-B. Pan, Z.-G. Zhang, H. Tian and C.-T. Che, *Theranostics*, 2018, **8**(21), 5945.
- 31 R. Peng, P. Han, J. Fu, Z.-W. Zhang, S.-R. Ma, L.-B. Pan, Y.-Y. Xia, H. Yu, H. Xu and C.-X. Liu, *Front. Microbiol.*, 2022, **13**, 880118.
- 32 L. Wu, A. Kang, C. Shan, C. Chai, Z. Zhou, Y. Lin and Y. Bian, *J. Pharm. Biomed. Anal.*, 2019, **175**, 112762.
- 33 L. Guo, W. Katiyo, L. Lu, X. Zhang, M. Wang, J. Yan, X. Ma, R. Yang, L. Zou and W. Zhao, *Compr. Rev. Food Sci. Food Saf.*, 2018, **17**(4), 905-919.
- 34 Y.-S. Kim, J.-J. Kim, K.-H. Cho, W.-S. Jung, S.-K. Moon, E.-K. Park and D.-H. Kim, *J. Microbiol. Biotechnol.*, 2008, **18**(6), 1109-1114.
- 35 P. Jiang, Y. Ma, Y. Gao, Z. Li, S. Lian, Z. Xu, W. Jiang, X. Tian and C. Huang, *J. Agric. Food Chem.*, 2016, **64**(27), 5490-5498.
- 36 J.-S. Tian, B.-Y. Shi, H. Xiang, S. Gao, X.-M. Qin and G.-H. Du, *PLoS one*, 2013, **8**(9), e75721.
- 37 W.-Y. Cao, Y.-N. Wang, P.-Y. Wang, W. Lei, B. Feng and X.-J. Wang, *Molecules*, 2015, **20**(11), 20569-20581.
- 38 X. W. Yang, J. Y. Zhang and W. Xu, *J. Peking Univ. Health Sci.*, 2007, **39**(6), 657-662.
- 39 H. Y. Alfarra and M. N. Omar, *Int. J. Pharma Med. Biol. Sci.*, 2014, **3**(3), 1.

40 M. Matsumoto, A. Ishige, Y. Yazawa, M. Kondo, K. Muramatsu and K. Watanabe, *PLoS one*, 2012, **7**(2), e31700.  
41 A. S. S. Hameed, P. S. Rawat, X. Meng and W. Liu, *Biotechnol. Adv.*, 2020, **43**, 107576.  
42 K. Struijs, J. P. Vincken and H. Gruppen, *J. Appl. Microbiol.*, 2009, **107**(1), 308-317.  
43 D. Eliwa, A.-R. S. Ibrahim, A. Kabbash, M. El-Aasr, M. Tomczyk, Y. A. Bin Jordan, G. E.-S. Batiha and A. E. Ragab,  
*Pharmaceuticals*, 2022, **15**(10), 1195.  
44 M. Zhang, C.-s. Peng and X.-b. Li, *Evid. Based Complement. Alternat. Med.*, 2015, **2015**(1), 252434.  
45 K. Petersen and T. J. Mansell, *Curr. Opin. Biotechnol.*, 2025, **95**, 103338.  
46 E. C. Pulido-Mateos, J. Lessard-Lord, Y. Desjardins and D. Roy, *Food Funct.*, 2024, **15**(13), 7189-7199.  
47 M. Dymarska, A. Widenmann, K. E. Low, D. W. Abbott, L. Guan and M. G. Ganzle, *J. Agric. Food Chem.*, 2024,  
**72**(10), 5428-5438.  
48 S. Alqudah and J. Claesen, *Gut Microbes*, 2024, **16**(1), 2426614.  
49 Y.-S. Kim, J.-J. Kim, K.-H. Cho, W.-S. Jung, S.-K. Moon, E.-K. Park and D.-H. Kim, *J. Microbiol. Biotechnol.*, 2008,  
**18**(6), 1109-1114.  
50 Y. Qin, S. Wang, Q. Wen, Q. Xia, S. Wang, G. Chen, J. Sun, C. Shen and S. Song, *Front. Pharmacol.*, 2022, **12**,  
831921.  
51 S. V. Luca, I. Macovei, A. Bujor, A. Miron, K. Skalicka-Woźniak, A. C. Aprotosoiaie and A. Trifan, *Crit. Rev. Food  
Sci. Nutr.*, 2020, **60**(4), 626-659.  
52 P. Dey, *Pharmacol. Res.*, 2019, **147**, 104367.  
53 H.-J. Lee, S.-M. Lim and D.-H. Kim, *J. Microbiol. Biotechnol.*, 2018, **28**(9), 1443-1446.  
54 C. Fritsch, A. Jänsch, M. A. Ehrmann, S. Toelstede and R. F. Vogel, *Curr. Microbiol.*, 2017, **74**(2), 247-256.  
55 N. Jiménez, M. Esteban-Torres, J. M. Mancheño, B. De Las Rivas and R. Muñoz, *Appl. Environ. Microbiol.*, 2014,  
**80**(10), 2991-2997.  
56 A. Braune and M. Blaut, *Environ. Microbiol.*, 2011, **13**(2), 482-494.  
57 Y. Zhao, X. Zhong, J. Yan, C. Sun, X. Zhao and X. Wang, *Front. Microbiol.*, 2022, **13**, 956378.  
58 Y. Ban, H. Yang, J. Jiang, T. Xia, Y. Pang, X. Cheng, Y. Yang, B. Lv and Y. Feng, *J. Agric. Food Chem.*, 2025, **73**(8),  
4725-4739.
